# Supplementary material for: Effect of Wear-Corrosion of Reduced Graphene Oxide Functionalized with Hyaluronic Acid on Inflammatory and Proteomic Response of J774A.1 Macrophages
Source: MDPI journal article supplement (doi:10.3390/met13030598), 2023-03-15
Supplement: s1 [file s1]

Archive with 1 entries (1 files):
- metals-2219437-supplementary.pdf
