# Supplementary material for: Effect of Wear-Corrosion of Reduced Graphene Oxide Functionalized with Hyaluronic Acid on Inflammatory and Proteomic Response of J774A.1 Macrophages
Source: MDPI journal article supplement (doi:10.3390/met13030598), 2023-03-15
Supplement: s1 [file s1 › metals-2219437-supplementary.pdf]

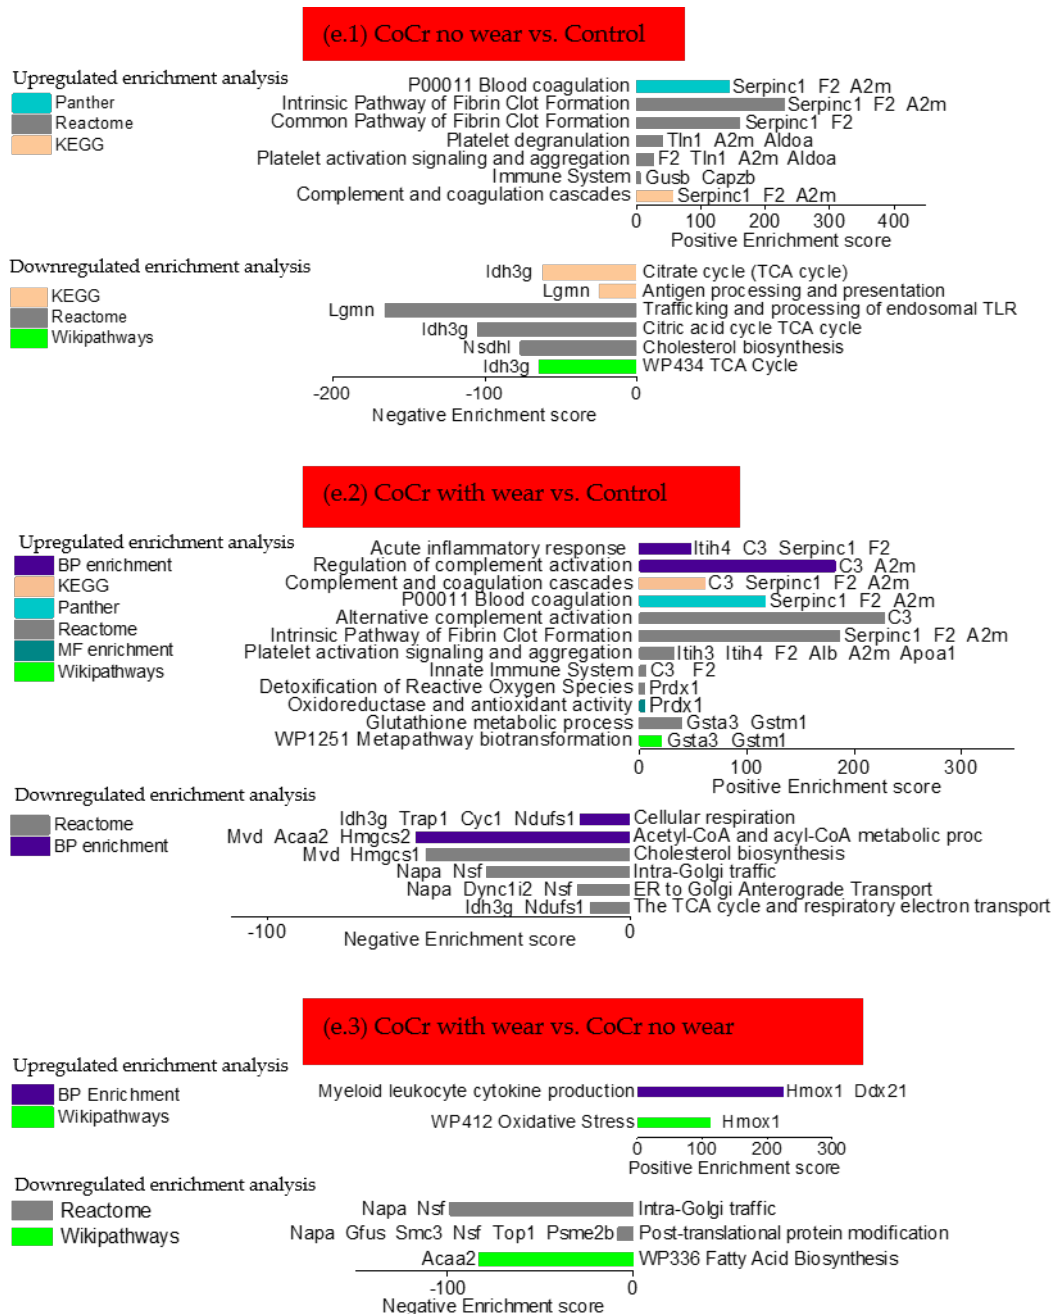

Figure S1. Pairwise Gene-Ontology enrichment analyses (e.1, e.2, e.3) of J744A.1 macrophages in response to CoCr-surfaces showing significant enriched GO terms. Positive enrichment scores of significant enriched GO-terms associated with up-regulated DEPs, and negative enrichment scores of significant enriched GO-terms as-associated with down-regulated DEPs. Each pairwise Gene-Ontology enrichment analysis was performed applying the corresponding DEPs computed from same pairwise comparison in volcano plots: CoCr no wear vs Control comparison (e.1) CoCr with wear vs Control comparison (e.2) CoCr with wear vs CoCr no wear comparison (e.3); Enriched GO terms with statistical significance computed with p-value < 0.05 in Shiny GO databases (BP enrichment, MF enrichments, Panther, KEGG, Reactome and Wikipathways data-bases).

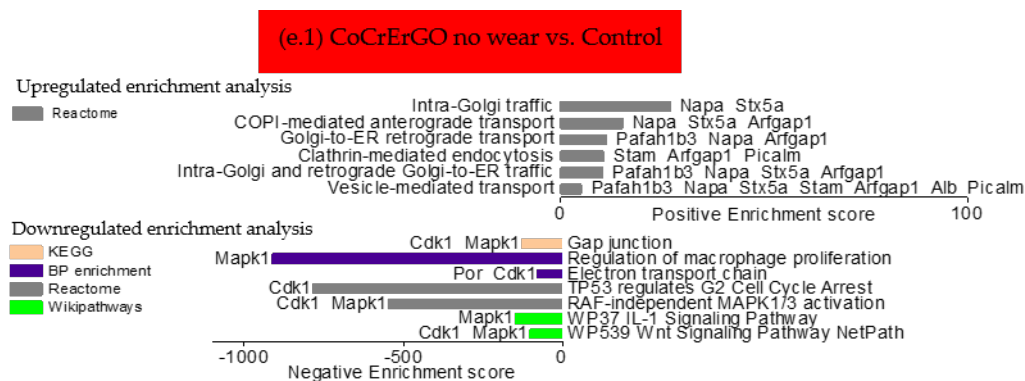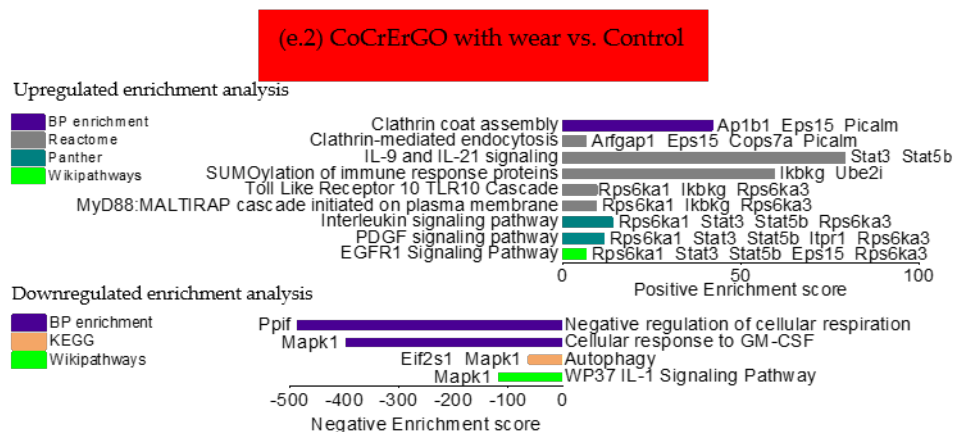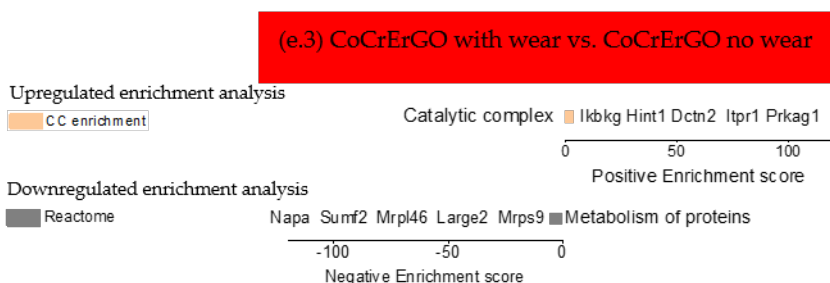

Figure S2. Pairwise Gene-Ontology enrichment analyses (e.1, e.2, e.3) of J744A.1 macrophages in response to CoCrErGO-surfaces showing significant enriched GO terms. Positive enrichment scores of significant enriched GO-terms associated with up-regulated DEPs, and negative enrichment scores of significant enriched GO-terms associated with down-regulated DEPs. Each pairwise Gene-Ontology enrichment analysis was performed applying the corresponding DEPs computed from same pairwise comparison in volcano plots: CoCrErGO no wear vs Control comparison (e.1) CoCrErGO with wear vs Control comparison (e.2) CoCrErGO with wear vs CoCrErGO no wear comparison (e.3); Enriched GO terms with statistical significance computed with  $p$ -value  $< 0.05$  in Shiny GO databases (BP enrichment, CC enrichment, KEGG, Reactome, Wikipathways and Panther databases)

### (e.1) CoCrErGOHA no wear vs. Control

#### Upregulated enrichment analysis

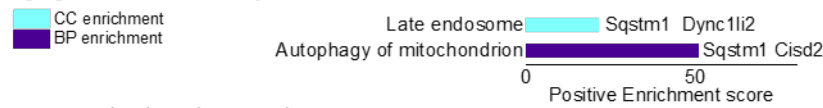

#### Downregulated enrichment analysis

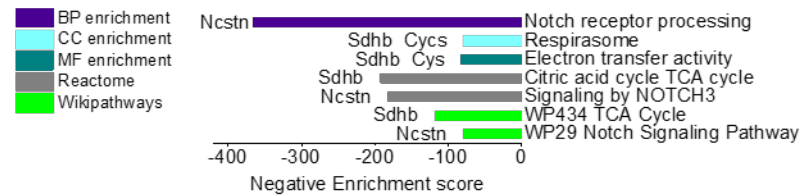

### (e.2) CoCrErGOHA with wear vs. Control

#### Upregulated enrichment analysis

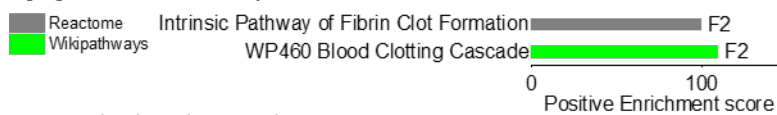

#### Downregulated enrichment analysis

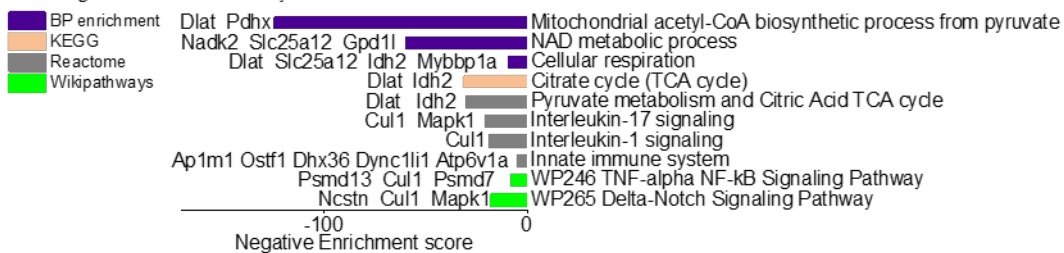

### (e.3) CoCrErGOHA with wear vs. CoCrErGOHA no wear

#### Downregulated enrichment analysis

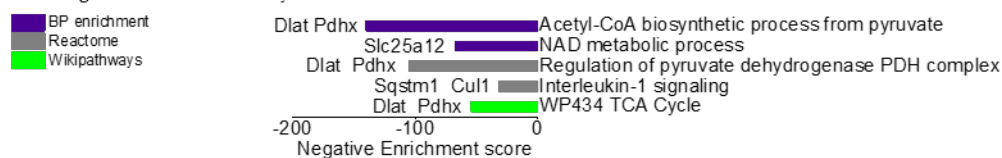

Figure S3. Pairwise Gene-Ontology enrichment analyses (e.1, e.2, e.3) of J744A.1 macrophages in response to CoCrErGOHA-surfaces showing significant enriched GO terms. Positive enrichment scores of significant enriched GO-terms associated with up-regulated DEPs, and negative enrichment scores of significant enriched GO-terms as-associated with down-regulated DEPs. Each pairwise Gene-Ontology enrichment analysis was performed applying the corresponding DEPs computed from same pairwise comparison in volcano plots: CoCrErGO no wear vs Control comparison (e.1) CoCrErGOHA with wear vs Control comparison (e.2) CoCrErGOHA with wear vs CoCrErGOHA no wear comparison (e.3); Enriched GO terms with statistical significance computed with p-value < 0.05 in Shiny GO databases (BP enrichment, CC enrichment, MF enrichments, KEGG, Reactome, Wikipathways databases).
